# Supplementary material for: Adsorption Features of Various Inorganic Materials for the Drug Removal from Water and Synthetic Urine Medium: A Multi-Technique Time-Resolved In Situ Investigation
Source: MDPI journal article supplement (doi:10.3390/ma14206196), 2021-10-19
Supplement: s1 [file s1]

# Adsorption Features of Various Inorganic Materials for the Drug Removal from Water and Synthetic Urine Medium: A Multi-technique Time-Resolved In Situ Investigation

Enrico Boccaleri\*, Cristina Marzetti, Giorgio Celoria, Claudio Cassino, Geo Paul\*, Ivana Miletto\* and Enrica Gianotti

Centre, Dipartimento di Scienze ed Innovazione Tecnologica (DiSIT), Università del Piemonte Orientale, Viale T. Michel 11, 15121 Alessandria, Italy; cristina.marzetti@yahoo.it (CM); giorgio.celoria@uniupo.it (GC); claudio.cassino@uniupo.it (CC); enrica.gianotti@uniupo.it (EG)

\* Correspondence: enrico.boccaleri@uniupo.it (EB); geo.paul@uniupo.it (GP); ivana.miletto@uniupo.it (IM)

**Table S1.** The concentrations and amounts of synthetic urine components used throughout the experiments.

| Components                                | M <sub>w</sub><br>(g mol <sup>-1</sup> ) | [C]<br>(mmol L <sup>-1</sup> ) | Mass<br>(g) |
|-------------------------------------------|------------------------------------------|--------------------------------|-------------|
| Urea                                      | 60.06                                    | 250                            | 15.02       |
| NaCl                                      | 58.44                                    | 44                             | 2.57        |
| Na <sub>2</sub> SO <sub>4</sub>           | 142.04                                   | 15                             | 2.13        |
| KCl                                       | 74.55                                    | 40                             | 2.98        |
| MgCl <sub>2</sub> •6H <sub>2</sub> O      | 203.3                                    | 4                              | 0.81        |
| NaH <sub>2</sub> PO <sub>4</sub>          | 119.98                                   | 20                             | 2.40        |
| CaCl <sub>2</sub>                         | 129                                      | 4                              | 0.44        |
| Na <sub>3</sub> Citrate•2H <sub>2</sub> O | 294.1                                    | 2.7                            | 0.79        |

**Table S2.** Parameters used for calculating the initial concentration of active substance.

| Active sub-<br>stance | <sup>1</sup> DDD (mg/day) | <sup>2</sup> F (%) | <sup>3</sup> V <sub>urine</sub> (mL) | <sup>4</sup> [C] (mg L <sup>-1</sup> ) | <sup>4</sup> [C] (M)    |
|-----------------------|---------------------------|--------------------|--------------------------------------|----------------------------------------|-------------------------|
| Ibu-Na                | 1200                      | 3                  | 1500                                 | 23.7                                   | 1.15 × 10 <sup>-4</sup> |

<sup>1</sup>DDD (Daily Defined Dose), <sup>2</sup>F is the unchanged excreted drug fraction through the urine, <sup>3</sup>V<sub>urine</sub> the average daily urine volume, <sup>4</sup>[C] is concentration.

**Table S3.** <sup>13</sup>C chemical shift (ppm) assignments of Ibu-Na in liquid state, solid state, confined state with and without water in MCM-41.

| Atom | Liquid state | Solid state | Confined state<br>(with H <sub>2</sub> O) | Confined state (with-<br>out H <sub>2</sub> O) |
|------|--------------|-------------|-------------------------------------------|------------------------------------------------|
| C1   | 21.6         | 22.6        | 22                                        | 21.9                                           |
| C2   | 29.7         | 30          | 29.6                                      | 29.7                                           |
| C3   | 44.2         | 44.5        | 44.6                                      | 44.8                                           |
| C4   | 140.5        | 138.8       | 139                                       | 138.9                                          |
| C5   | 129.4        | 129.1       | 128.8                                     | 128.7                                          |
| C6   | 127.2        | 127.5       | 127.3                                     | 127.2                                          |
| C7   | 140.7        | 141.9       | 140.9                                     | 140.8                                          |
| C8   | 48.2         | 48.7        | 48.3                                      | 48                                             |
| C9   | 18.5         | 16.6        | 18.9                                      | 18.9                                           |

|     |     |       |       |       |
|-----|-----|-------|-------|-------|
| C10 | 184 | 183.4 | 183.3 | 183.5 |
|-----|-----|-------|-------|-------|

**Table S4.** Adsorption of Ibu-Na from synthetic urine at pH 4 on selected inorganic adsorbents.

| Adsorbents  | Adsorption<br>( $\pm 2$ ) % | loading<br>(mg/g) |
|-------------|-----------------------------|-------------------|
| Cloisite-Na | 0                           | 0                 |
| Cloisite-Ca | 2                           | 0.08              |
| MCM-41      | 60                          | 3.02              |
| MCM-41 NPs  | 44                          | 2.14              |
| Hier ZSM-5  | 51                          | 2.54              |

**Table S5.** Adsorption of Ibu-Na from synthetic urine at pH 8 on selected inorganic adsorbents.

| Adsorbents  | Adsorption<br>( $\pm 2$ ) % | loading<br>(mg/g) |
|-------------|-----------------------------|-------------------|
| Cloisite-Na | 0                           | 0                 |
| Cloisite-Ca | 5                           | 0.26              |
| MCM-41      | 10                          | 0.48              |
| MCM-41 NPs  | 10                          | 0.51              |
| Hier ZSM-5  | 10                          | 0.49              |

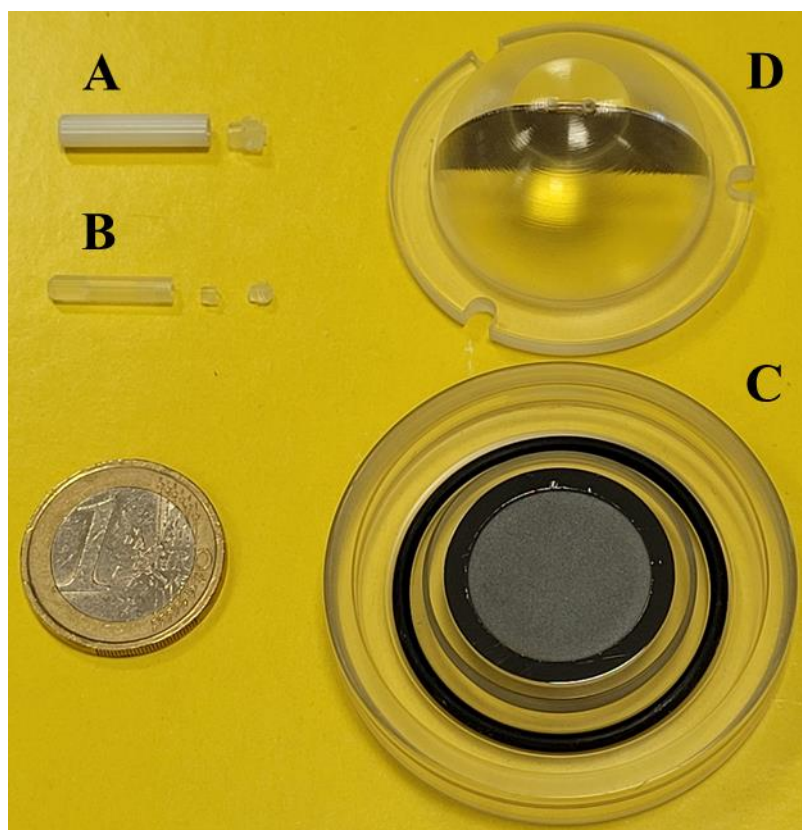

**Scheme 1.** Tools for time-resolved *in situ* MAS NMR experiments, 4 mm zirconia rotor and Kel-F cap (A), Kel-F insert, plug and screw (B). Tools for time-resolved *in situ* powder XRD experiments, low background and airtight PMMA specimen holder with a sample reception of 20 mm diameter silicon wafer with cavity (C), a dome like cap equipped with a knife edge beam stop (D) and a one Euro coin.

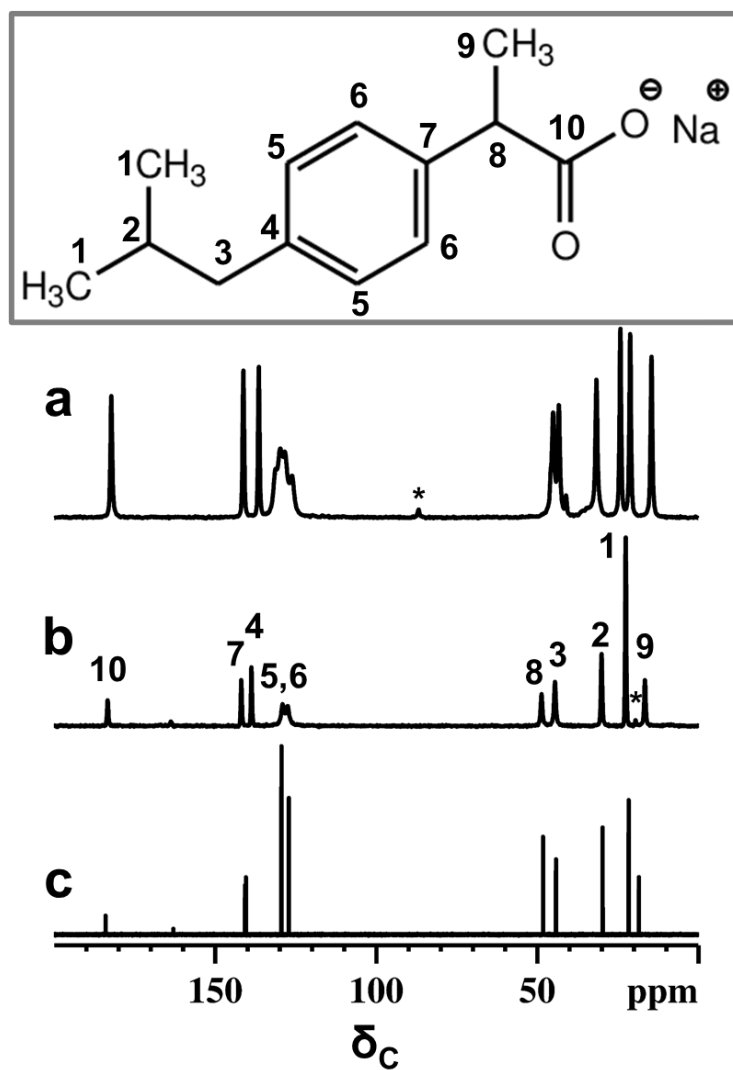

**Figure S1.**  $^{13}\text{C}$  CPMAS NMR spectra of ibuprofen in acid-form (a) and sodium salt-form (b) showing the differences in their crystallographic states. For comparison purpose, the liquid-state NMR spectrum of ibuprofen in sodium salt-form collected using  $\text{D}_2\text{O}$  as solvent is also shown (c). Inset shows the molecular structure of ibuprofen in sodium salt-form with the  $^{13}\text{C}$  labelling. \* indicates peaks due to spinning side-bands.

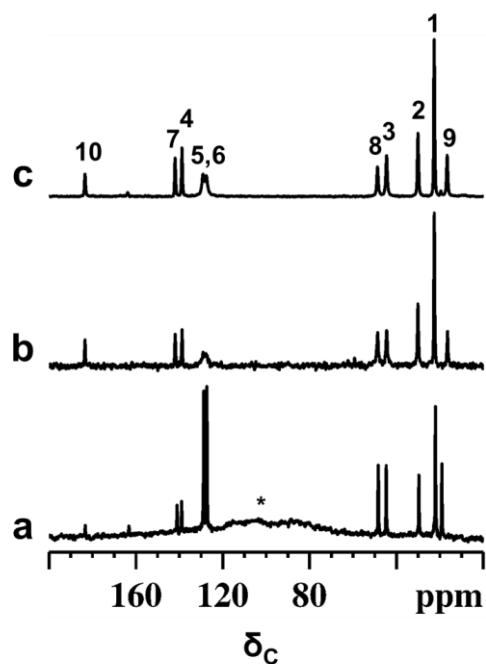

**Figure S2.**  $^{13}\text{C}$  MAS (a) and CPMAS (b) NMR spectra of Ibu-Na mixed with  $\text{D}_2\text{O}$ . The NMR spectra were recorded within 10 minutes of contact between ibuprofen and  $\text{D}_2\text{O}$ . For comparison purpose, the  $^{13}\text{C}$  CPMAS NMR spectrum (c) of Ibu-Na before contact with  $\text{D}_2\text{O}$  is also shown. \* indicates peak due to probe background.

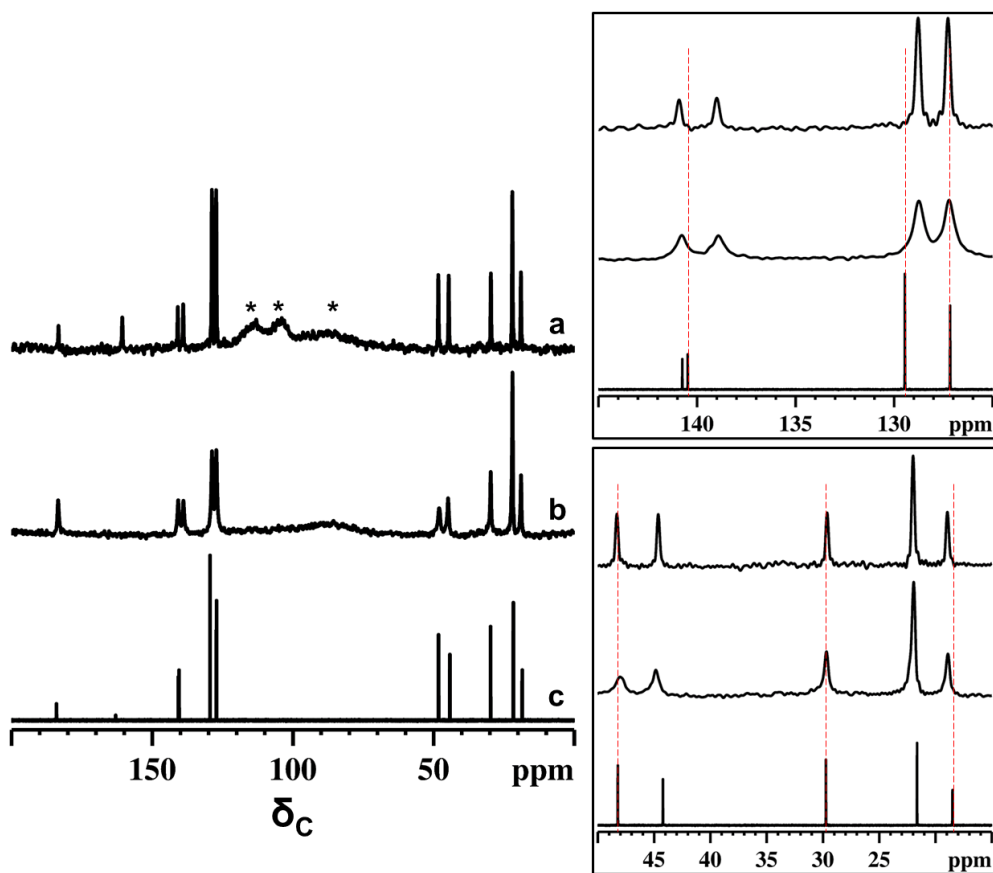

**Figure S3.**  $^{13}\text{C}$  MAS NMR spectra of physical mixture of Ibu-Na and MCM-41 after 1200 minutes of contact with  $\text{D}_2\text{O}$  (a), Ibu-Na loaded in MCM-41 with mechanoloading (without any solvents) (b) and the liquid-state NMR spectrum of Ibu-Na in  $\text{D}_2\text{O}$  (c). Insets show the zoom spectra. \* indicates peak due to either probe background or Kel-F insert.

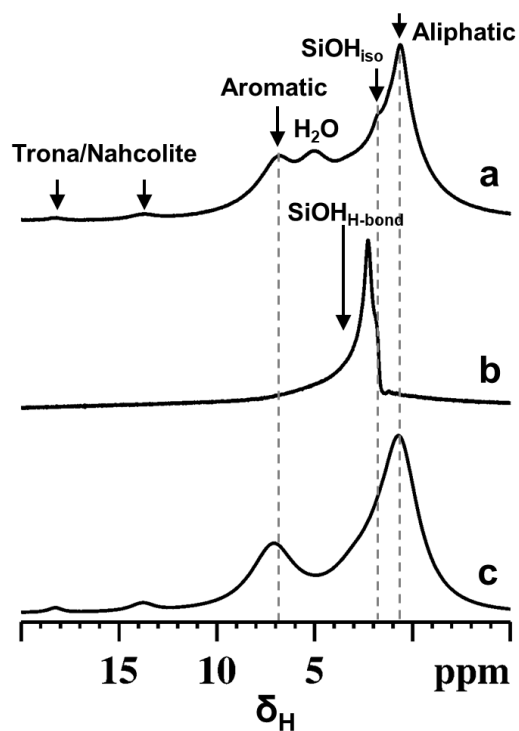

**Figure S4.**  $^1\text{H}$  MAS NMR spectra of physical mixture (a) together with the spectra of MCM-41 (b) and Ibu-Na (c).

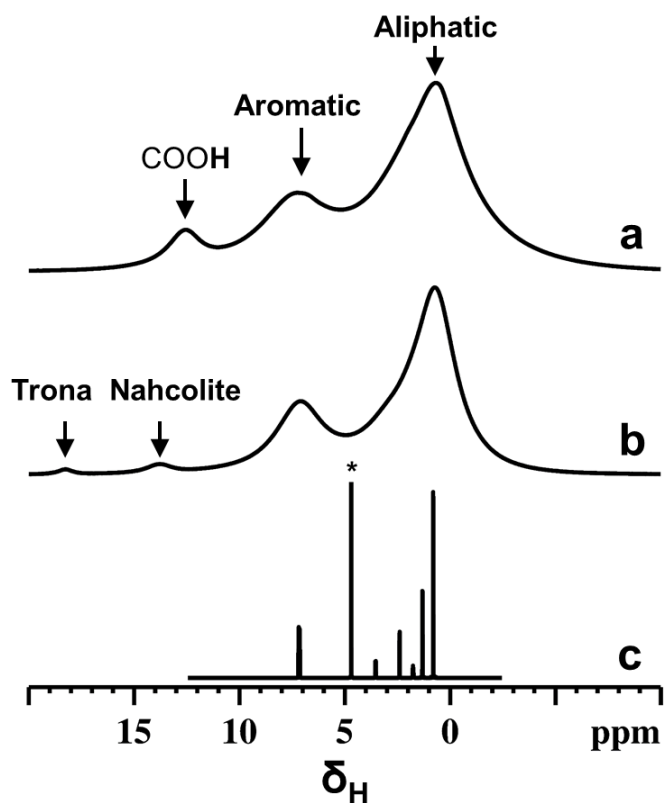

**Figure S5.**  $^1\text{H}$  MAS NMR spectra of ibuprofen in acid-form (a) and sodium salt-form (b). For comparison purpose, the liquid-state NMR spectrum of ibuprofen in sodium salt-form collected using  $\text{D}_2\text{O}$  as solvent is also shown (c). Traces of  $\text{NaHCO}_3$  polymorphs (Trona and Nahcolite) are present in sample b. \* denote solvent peak.

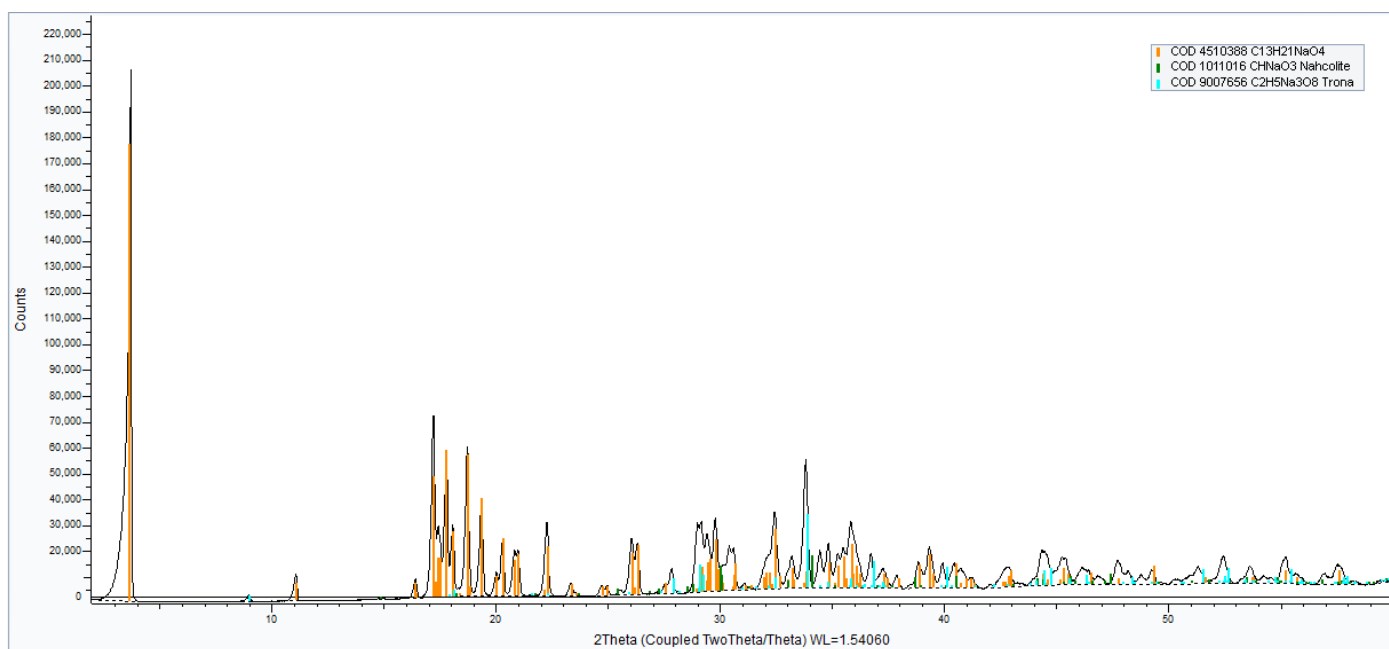

**Figure S6.** Powder XRD pattern of Ibu-Na along with the phase determination and identification using EVA software. Peaks from Ibu-Na - COD 4510388 in orange, minor phases such as Trona - COD 907656 in cyan and Nahcolite - COD 1011016 in green.

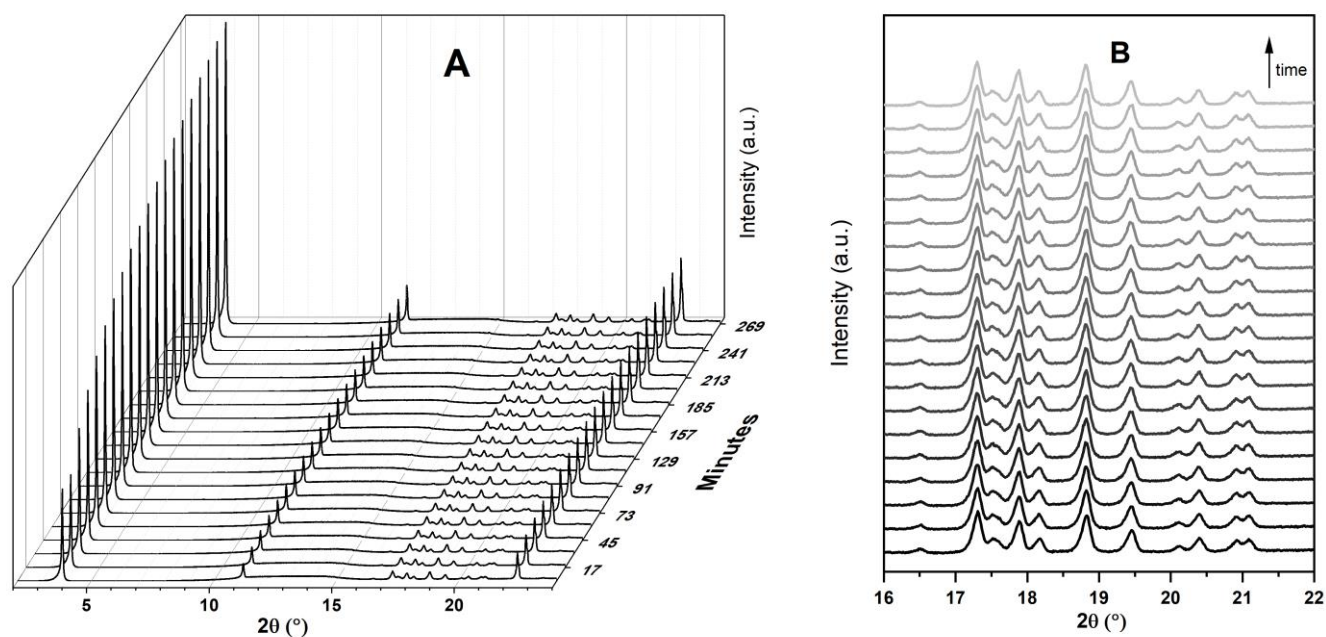

**Figure S7.** Stacked plot of the time resolved *in situ* PXRD patterns (A) collected during the sorption of water on Ibu-Na. The zoom version of the selected range showing the identical diffraction patterns (B).
